# Supplementary material for: Two appendages homologous between basal bodies and centrioles are formed using distinct Odf2 domains
Source: PubMed Central journal article supplement — J Cell Biol. 2013 Nov 11;203(3):417–25. doi: 10.1083/jcb.201303071 (PMC3824012; doi:10.1083/jcb.201303071), 2013-11-11
Supplement: supp_jcb.201303071_JCB_201303071_sm.pdf [file supp_jcb.201303071_JCB_201303071_sm.pdf]

Tateishi et al., <http://www.jcb.org/cgi/content/full/jcb.201303071/DC1>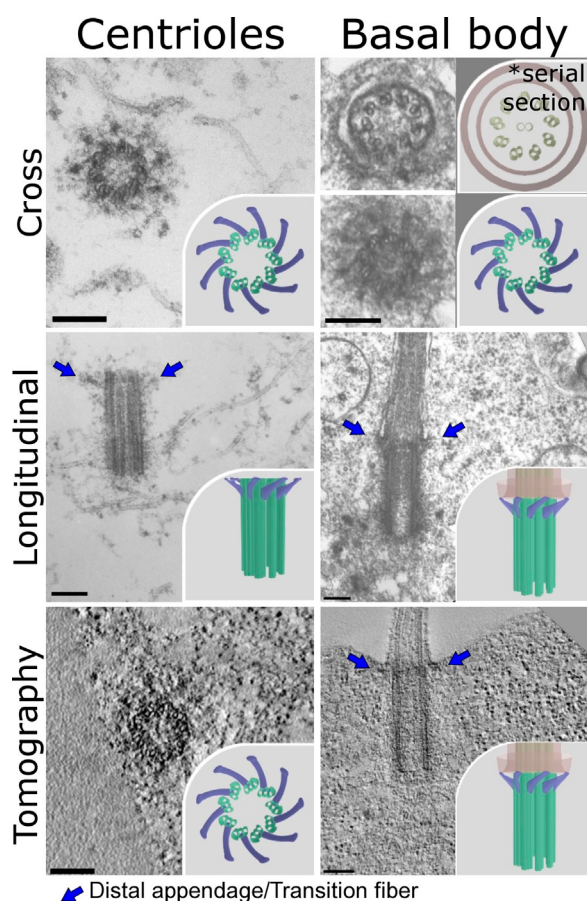

Figure S1. **Electron micrographs of appendages reconstituted on centrioles and basal bodies by the transfected Ca construct.** Note the distal appendages (DAs) on centrioles, and transition fibers (TFs) on basal bodies (blue arrows). Thin-section electron microscopic images of cross sections (Cross) and longitudinal sections (Longitudinal) of centrioles and cilia. Tomography: Ultra-high voltage electron microscopic tomographic images of centrioles and cilia. Bars, 0.2  $\mu$ m.

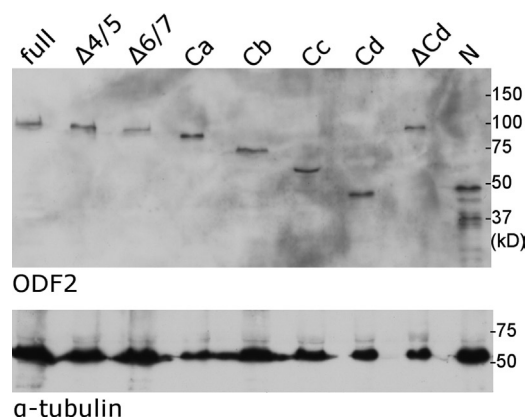

Figure S2. **Western blotting analysis of *Odf2*-KO F9 cells in which GFP-tagged *Odf2* deletion constructs were expressed.** Primary antibody: rabbit anti-GFP pAb and mouse anti- $\alpha$ -tubulin mAb.

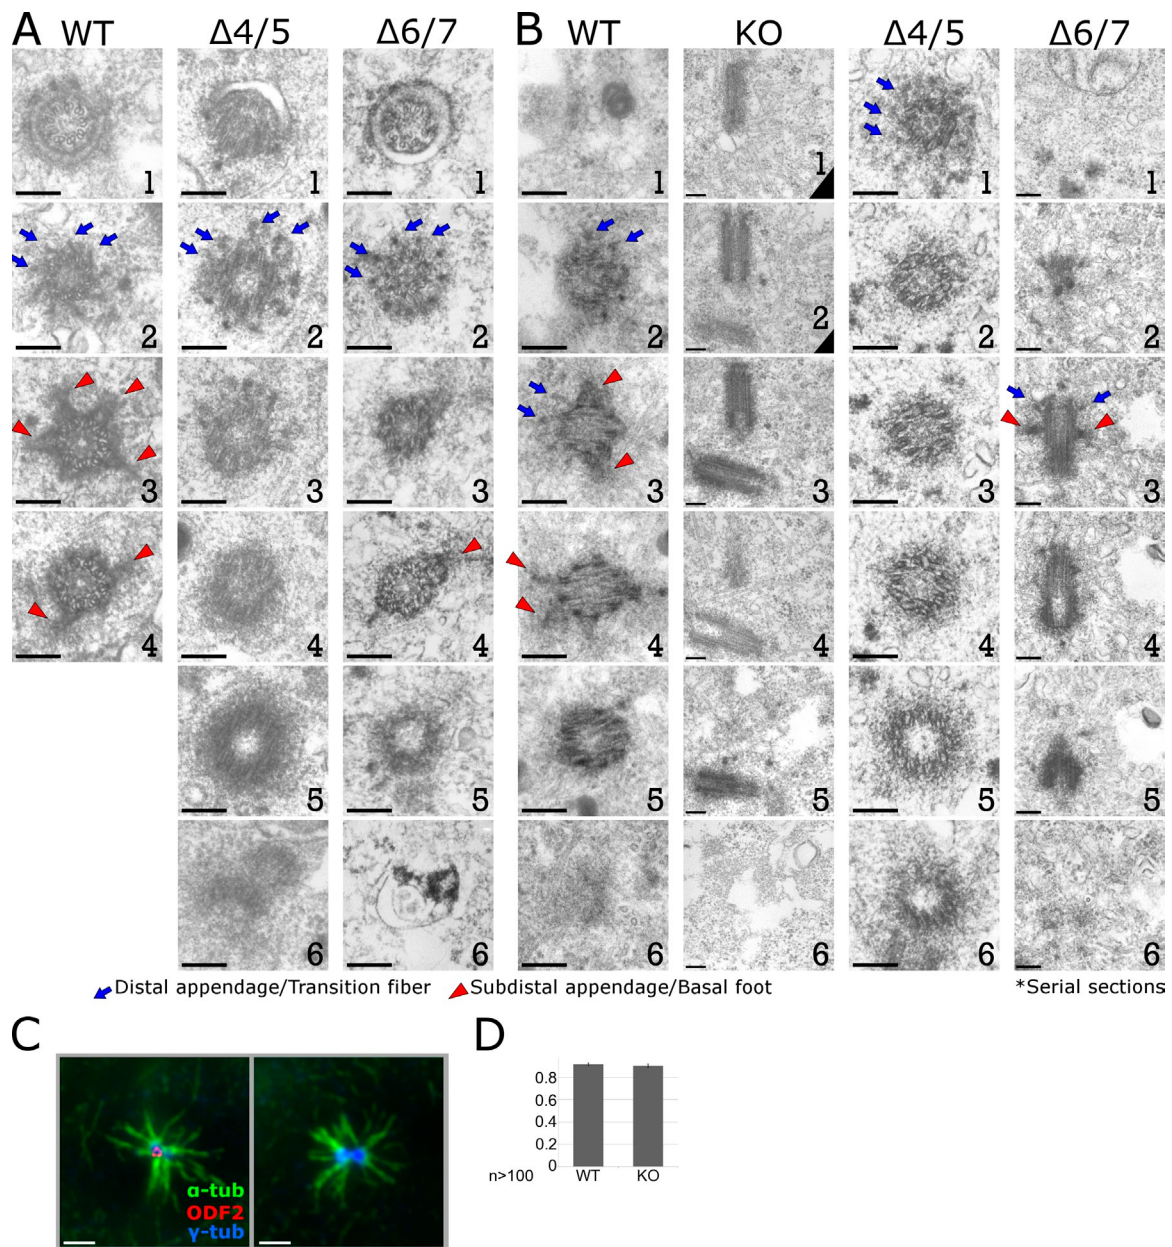

Figure S3. **(A)** Serial cross sections of basal bodies with TF+BF+ and TF+BF- appendages. WT: (TF+BF+) basal body in WT F9 cells.  $\Delta 4/5$ : (TF+BF-) basal body in  $\Delta 4/5$  construct-expressing *Odf2*-KO F9 cells.  $\Delta 6/7$ : (TF+BF+) basal body in  $\Delta 6/7$  construct-expressing *Odf2*-KO F9 cells. Bars, 0.2  $\mu\text{m}$ . TFs, blue arrows; BF, red arrowheads. The cross section electron micrographs in the top two rows are the same images as in the top two rows of Fig. 1 D. **(B)** Serial cross and longitudinal sections of centrioles with DA+SA+, DA-SA-, and DA+SA- appendage patterns. WT: (DA+SA+) centriole in WT F9 cells. KO: (DA-SA-) centriole in *Odf2*-KO F9 cells.  $\Delta 4/5$ : (DA+SA-) centriole in  $\Delta 4/5$  construct-expressing *Odf2*-KO F9 cells.  $\Delta 6/7$ : (DA+SA+) centriole in  $\Delta 6/7$  construct-expressing *Odf2*-KO F9 cells. DAs, blue arrows; SAs, red arrowheads. **(C)** MTOC activity on the centrioles of (DA+SA+) and (DA-SA-) types. WT: (DA+SA+) centriole in WT F9 cells. KO: (DA-SA-) centriole in *Odf2*-KO F9 cells. Bars, 1  $\mu\text{m}$ . **(D)** Quantification of the nucleation of MTs in WT and *Odf2*-KO F9 cells, determined by the proportion of centrioles associated with asters formed by microtubules. The nucleation activity was high in both cases ( $n > 100$  in more than three independent experiments).

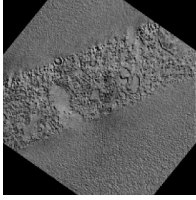

Video 1. **UHVEM tomographic images of the ciliary basal body of an *Odf2*-WT F9 cell and its schematic drawing.** Note the TF (blue) and BF (red) structures in the drawing.

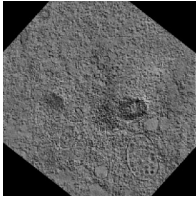

Video 2. **UHVEM tomographic images of the ciliary basal body of an *Odf2*-KO F9 cell expressing the  $\Delta 4/5$  construct and its schematic drawing.** Note the TF structures (blue) in the drawing.

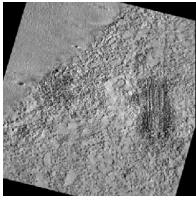

Video 3. **UHVEM tomographic images of the ciliary basal body of an *Odf2*-KO F9 cell expressing the  $\Delta 6/7$  construct and its schematic drawing.** Note the TF (blue) and BF (red) structures in the drawing.

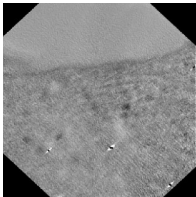

Video 4. **UHVEM tomographic images of the ciliary basal body of an *Odf2*-KO F9 cell expressing the Ca construct and its schematic drawing.** Note the TF structures (blue) in the drawing.

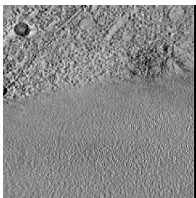

Video 5. **UHVEM tomographic images of a centriole in an *Odf2*-WT F9 cell and its schematic drawing.** Note the DA (blue) and SA (red) structures in the drawing.

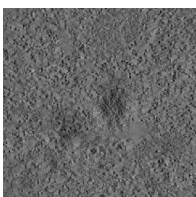

Video 6. **UHVEM tomographic images of a centriole in an *Odf2*-KO cell and its schematic drawing.** Note the lack of both the SA (blue) and DA (red) structures in the drawing.

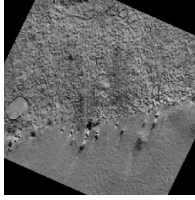

Video 7. **UHVEM tomographic images of a centriole in an *Odf2*-KO F9 cell expressing the  $\Delta 4/5$ -construct and its schematic drawing.** Note the DA structures (blue) in the drawing.

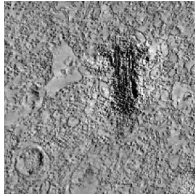

Video 8. **UHVEM tomographic images of a centriole in an *Odf2*-KO F9 cell expressing the  $\Delta 6/7$ -construct and its schematic drawing.** Note the DA (blue) and SA (red) structures in the drawing.

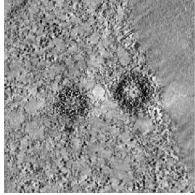

Video 9. **UHVEM tomographic images of a centriole in an *Odf2*-KO F9 cell expressing the Ca construct and its schematic drawing.** Note the DA structures (blue) in the drawing.
